# Supplementary material for: A direct role for Sox10 in specification of neural crest-derived sensory neurons
Source: Oxford University Press journal article supplement (doi:10.1242/dev.02668), 2006-10-25
Supplement: dev02668supptable.pdf [file dev02668supptable.pdf]

**Table S1. Cell autonomy of *sox10* action in DRG sensory neurons**

| Experimental series | Genotype                         | Number of transplants | Number of DRG with donor contribution | Total donor DRG neurons | Mean+s.d. number neurons/<br>chimeric DRG |
|---------------------|----------------------------------|-----------------------|---------------------------------------|-------------------------|-------------------------------------------|
| A                   | WT → WT sibling                  | 43                    | 46                                    | 53                      | 1.15+0.47                                 |
|                     | WT → <i>sox10</i> <sup>-/-</sup> | 18                    | 21                                    | 30                      | 1.43+0.75                                 |
| B                   | WT sibling → WT                  | 68                    | 54                                    | 87                      | 1.61+0.98                                 |
|                     | <i>sox10</i> <sup>-/-</sup> → WT | 30                    | 14                                    | 7                       | 0.50+0.52*                                |

\*Significant,  $P < 0.0001$ ; Mann-Whitney *U*-test.

WT, wild type.
